# Supplementary material
Source: Research Square preprint supplement (doi:10.21203/rs.3.rs-9889232/v1)
Supplement: Supplementary file 1 [file c07bddea619083597a6aac54.docx]

**Cascade Oxidation and Cation Exchange Reactions to Progressively Engineer High-entropy Metal Oxides**

Liyan Zhao1,2§, Zhiruo Zhao2§, Wentong Zhang2§, Yuhua Liu2, Jiaying Jin2, Mi Yan2,3,4, and Shikuan Yang2,3,4*

1Department of Medical Oncology, The Second Affiliated Hospital, Zhejiang University School of Medicine, Hangzhou 310003, China

2School of Materials Science and Engineering, Zhejiang University, Hangzhou 310027, China

3State Key Laboratory of Baiyunobo Rare Earth Resource Researches and Comprehensive Utilization, Baotou Research Institution of Rare Earths, Baotou 014030, China

4Zhejiang Province Key Laboratory of Advanced Information Materials, Hangzhou 310027, China

§These authors contributed equally to this work

*Corresponding author. Email: shkyang@zju.edu.cn (S.K.)

**Part I. Materials and Methods**

**1. Experimental section**

**1.1 Chemicals**

Nickel nitrate (Ni(NO3)2·6H2O), chromic nitrate (Cr(NO3)3·9H2O), lead nitrate(Pb(NO3)2), zinc nitrate (Zn(NO3)2·6H2O), ferric nitrate (Fe(NO3)3·9H2O), ferrous sulfate (FeSO4·7H2O), silver nitrate (AgNO3), boric acid (H3BO3), potassium chloride (KCl), and ethyl alcohol were purchased from Sinopharm Chemical Reagent Co., Ltd. Sodium sulphide (Na2S·9H2O) was purchased from Macklin. Manganous nitrate (Mn(NO3)2) and potassium iodide (KI) were purchased from Energy Chemical. Cobalt nitrate (Co(NO3)2·6H2O) was purchased from Aladdin. Sodium borohydride (NaBH4) was purchased from Sigma-Aldrich Co., Ltd. All chemical reagents were of analytical grade and used without further purification.

**1.2 Electrodeposition of Ag7O8NO3 microstructures**

10 nm-thick titanium and 50 nm-thick gold film were thermally evaporated onto a piece of silicon wafer at a rate of 0.1 nm/s. The gold film-covered silicon wafer was cut into small pieces with an area of 1 cm×2 cm serving as the working electrode. The working electrode was washed with deionized water and then treated in a plasma cleaner for 10 min to obtain a hydrophilic surface. Electrodeposition was carried out using a three-electrode system. The reference electrode was Ag/AgCl. The counter electrode was a carbon rod (8 cm×Ф5 mm). The electrolyte solution was composed of AgNO3 (0.06 M) and H3BO3 (0.16 M). All the electrodeposition processes were performed at room temperature. The Ag7O8NO3 microarchitectures were deposited on the anode electrode surface. The potential waveform was generated by an electrochemical workstation (CHI 660D, CH Instruments Ins.).

**1.3 Conversion of Ag7O8NO3 to multicomponent metal oxides**

The Ag7O8NO3 microparticle powders were collected from the electrode surface by immersing it into water. The Ag7O8NO3 microparticle powders were dispersed into 5 ml of 50 mM ion aqueous solutions (*i.e.*, Co(NO3)2, Ni(NO3)2, Mn(NO3)2, Pb(NO3)2, FeSO4) to finish the transformation to multicomponent metal oxides.

**1.4 Synthesis of high-entropy metal oxides by COCE reactions**

In a typical reaction, the Ag7O8NO3 microarchitectures were placed in a square container containing 9 ml of 50 mM Ni(NO3)2 aqueous solutions. After 1 h reaction, AgNiO2 microarchitectures were prepared. Next, the AgNiO2 microarchitectures were cleaned with deionized water and then was immersed in 9 ml of 50 mM Co(NO3)2 aqueous solutions. The reaction proceeded for 3 min to replace Ni with Co in the lattice, generating Ag(Ni, Co)O2 microarchitectures. Similarly, the Ag(Ni, Co)O2 microarchitectures were immersed in 9 ml of 50 mM Mn(NO3)2 aqueous solutions for 1 min to introduce Mn, giving rise to the formation of Ag(Ni, Co, Mn)O2. Next, the composition transformation was conducted by immersing the microarchitectures into 9 ml of 50 mM FeSO4 aqueous solutions for 30 s to synthesize Ag(Ni, Co, Mn, Fe)O2. As last, Ag(Ni, Co, Mn, Fe)O2 microarchitectureswere immersed into 9 ml of 50 mM Cr(NO3)3 ethanol solutions. The reaction was allowed to proceed for 2 min to create Ag(Ni, Co, Mn, Fe, Cr)O2 microtructures.

**2. Characterizations**

**2.1 Morphology and microstructure characterization**

The morphology of the microarchitectures was observed by a transmission electron microscope (TEM, FEI Talos F200x, American) and a scanning electron microscope (SEM, GeminiSEM 300) equipped with an energy dispersive spectrometer (EDS). X-ray diffraction (XRD) patterns were collected on an X-ray diffractometer (GIXRD, Rigaku Ultima IV, Japan). X-ray photoelectron spectroscopy (XPS) was performed using a Thermo Scientific spectrometer (ESCALAB 250Xi).

To track the morphological evolution during the OCE process, quasi-*in situ* SEM characterization was performed. A cross-shaped marker was first created on the gold electrode substrate to serve as a positional reference. Subsequently, Ag7O8NO3 micropyramids were electrodeposited onto the marked region at 2 V for 5 min. SEM images of the electrodeposited micropyramid were taken. Then, the Ag7O8NO3 micropyramid was immersed into the polyvalent ion solutios to initiate the OCE reactions. The micropyramid after OCE reactions was characterized by SEM to monitor the structural evolution. The above procedure was repeated several times to monitor the COCE reactions.

**2.2 OCP test**

OCP measurements were conducted to monitor the OCE reaction process in real time. The as-electrodeposited Ag7O8NO3 sample was used as the working electrode. A carbon plate with an area of 2 cm2 served as the counter electrode, and an Ag/AgCl electrode was employed as the reference electrode. The electrolyte were composed of polyvalent cations. The measurements were performed on an electrochemical workstation (CHI 760e) under OCP test mode. The potential of the system was continuously recorded as a function of time until a stable value was reached, indicating the completion of the reaction. The corresponding overpotential–time curves were then recorded for further analysis.

**2.3 *In situ* Raman spectroscopy measurements**

*In situ* Raman spectroscopy was performed to monitor the composition evolution during the OCE reaction process. The Raman spectra of an as-electrodeposited Ag7O8NO3 micropyramid were first collected. Subsequently, 100 μL of the polyvalent ion solutions were gently dropped onto the Ag7O8NO3 micropyramid to initiate the OCE reaction. Raman spectra of the same micropyramid were recorded after OCE reactions proceeded for 400 s, 900 s, and 1000 s.

**2.4 Oxygen evolution reaction measurements**

The OER electrocatalytic performance was evaluated using a standard three-electrode system. A piece of nickel foam with an area of 2 cm × 3 cm was selected as the substrate to accormadate the catalysts.

Ag7O8NO3 microtorpedoes were electrodeposited onto a piece of nickel foam. The as-prepared Ag7O8NO3 microtorpedo-decorated nickel foam was subsequently immersed in 50 mM NiSO4 solutions to initiate the OCE reactions. After 1000 s, the Ag7O8NO3 microtorpedoes were converted into AgNiO2 microtorpedoes. Further OCE reactions with Fe2+ ions in 50 mM FeSO4 solutions yielded Ag(Ni, Fe)O2 modified nickel foam. Complete OCE reactions between AgNiO2 and Fe2+ ions gave rise to the formation of AgFeO2 modified nickel foam. The obtained electrodes were then used as OER catalysts in 0.1 M KOH electrolyte. A piece of carbon plate with an area of 1.5 cm2 served as the counter electrode, and an Ag/AgCl electrode was used as the reference electrode.

Linear sweep voltammetry (LSV) measurements were performed with a scan rate of 0.02 V s-1. Electrochemical impedance spectroscopy (EIS) was conducted at the open-circuit potential with a frequency ranging from 105 to 0.01 Hz. All LSV curves were corrected for iR compensation (90%). EIS data were fitted using ZView software to extract equivalent circuit parameters.

**Part II. Supporting figures**

**
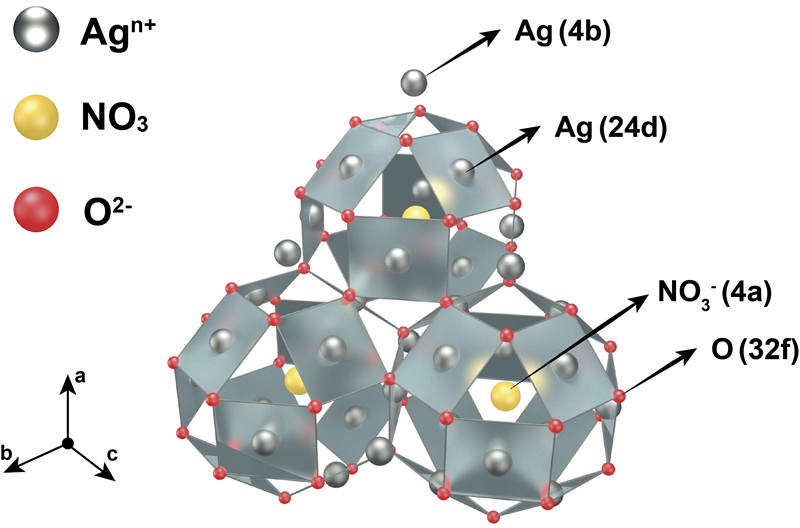
**

**Figure S1.** Schematic of the crystal structure of Ag7O8NO3. The structure is composed of connected Ag6O8 cages in which silver atoms occupy the 24d Wyckoff positions and O atoms occupy the 32f positions via silver atom at the 4b Wyckoff position. The anion is located at the center of the cage (4a site). The average oxidation state of Ag is +2.67, indicating a mixed-valence state of Ag2+and Ag3+.


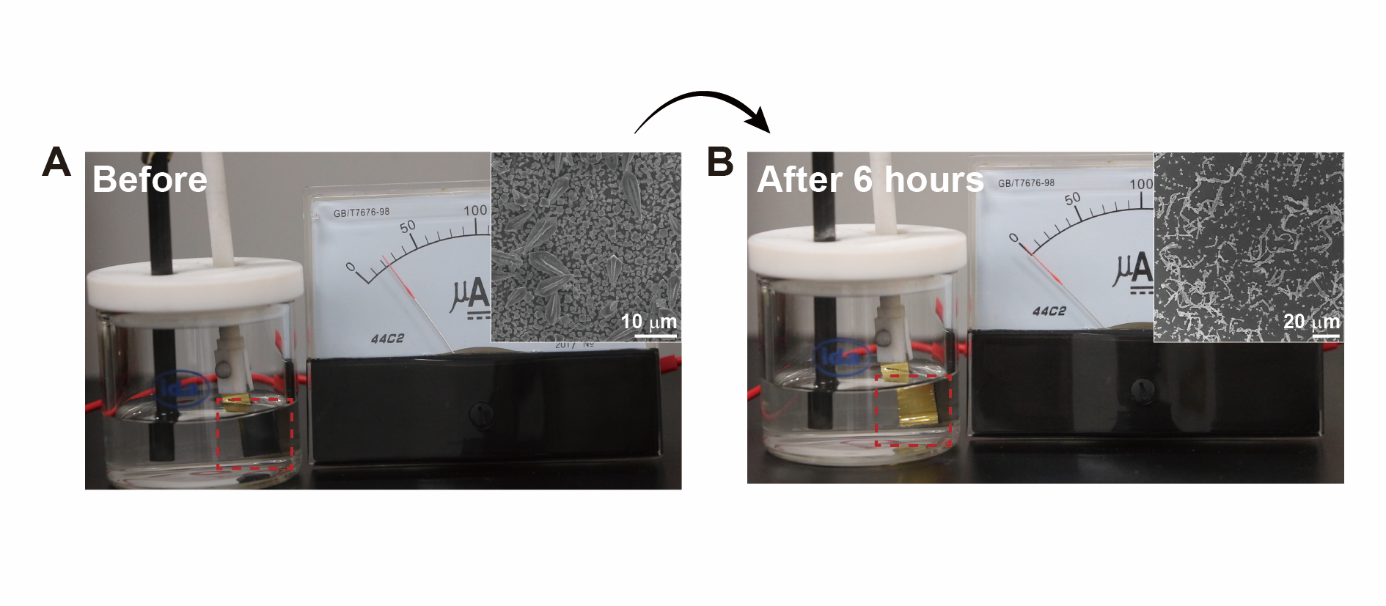


**Figure S2.** Ag7O8NO3 microtorpedoes gradually dissolved by electrochemical reactions in 0.1 M KNO3 aqueous solutions. (A) Generation of current during the dissolution process. (B) Ag7O8NO3 disappeared after storage for 6 h.


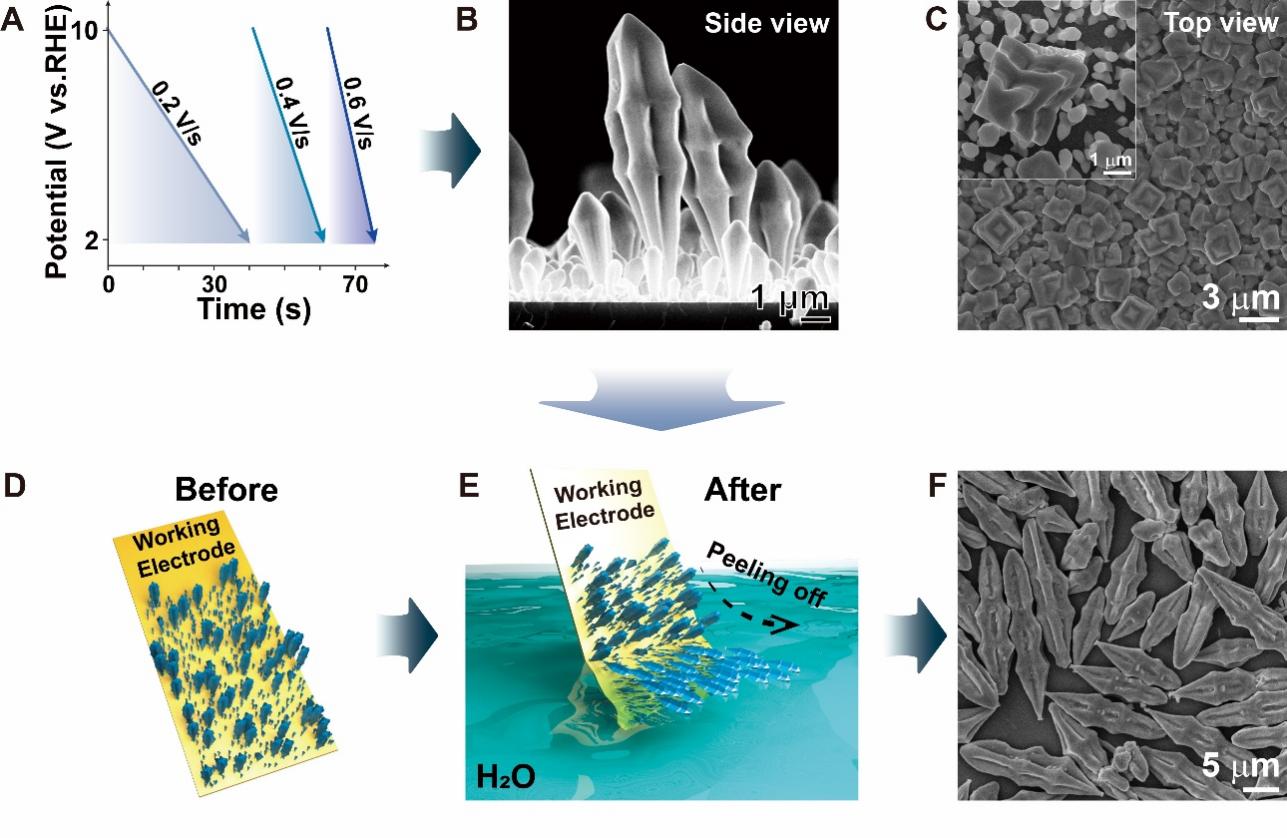


**Figure S3. Electrodeposition and selective peeling-off of the electrodeposited Ag7O8NO3 microtorpedoes from the electrode surface. (A)** The potential waveform used to synthesize the Ag7O8NO3 microtorpedoes. **(B)** Side-view of the microtorpedoes. **(C)** Top-view of the dense microtorpedoes. Inset: high-magnification view of a single microtorpedo. **(D)** Schematic of the as-electrodeposited Ag7O8NO3 microtorpedoes. **(E)** Peeling off the microtorpedoes from the electrode surface by immersing it into water. **(F)** SEM image of the microtorpedoes collected from the electrode surface.


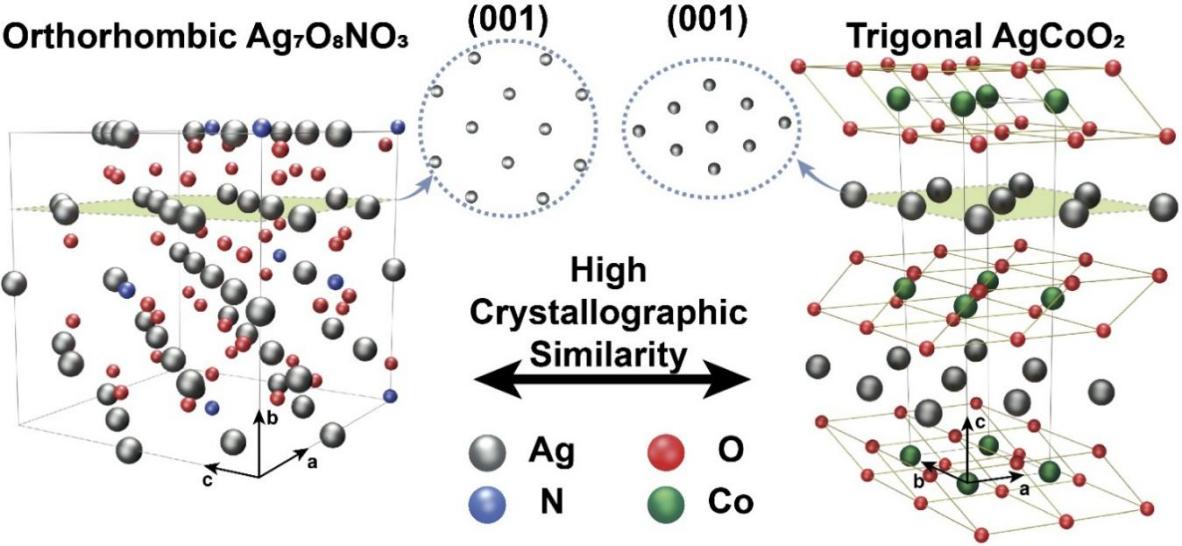


**Figure S4. Structural similarity between orthorhombic** **Ag7O8NO3 and trigonal AgCoO2**. Schematic of the crystal structure of (left) orthorhombic Ag7O8NO3 and (right) trigonal AgCoO2. The highlighted (001) planes in both structures demonstrate a high degree of crystallographic similarity. The circular insets provide a top-down view of the (001) atomic arrangement, highlighting the nearly identical quasi-hexagonal lattice of silver atoms (grey spheres). This structural match is the key factor in minimizing the lattice distortion and strain at the Ag7O8NO3/AgCoO2 core/shell interface.

**
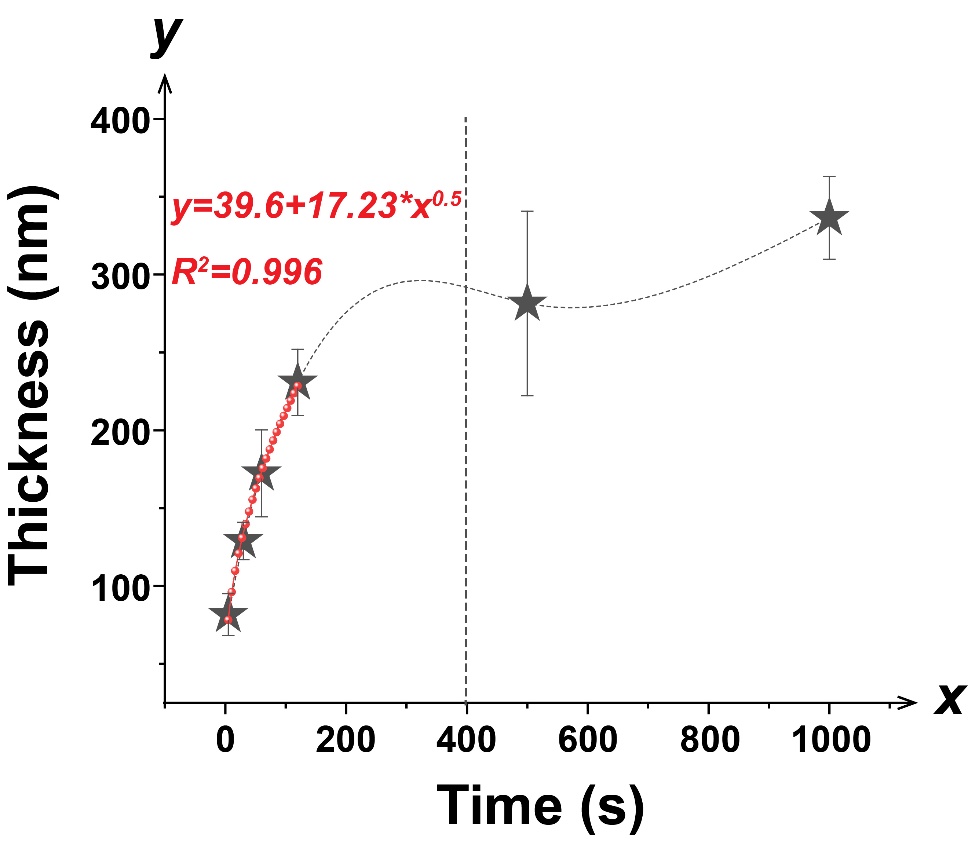
**

**Figure S5. Evolution of the AgCoO2 wall thickness as a function of the OCE reaction time.** The experimental data (indicated by stars) show the time-dependent increase of the AgCoO2 wall thickness. The thickness grow rapidly before 400 s. The red curve represents the numerical fitting of the growth Before 400 s, following a parabolic relationship. The early-stage formation of the AgCoO2 wall is governed by a diffusion-controlled mechanism.

**
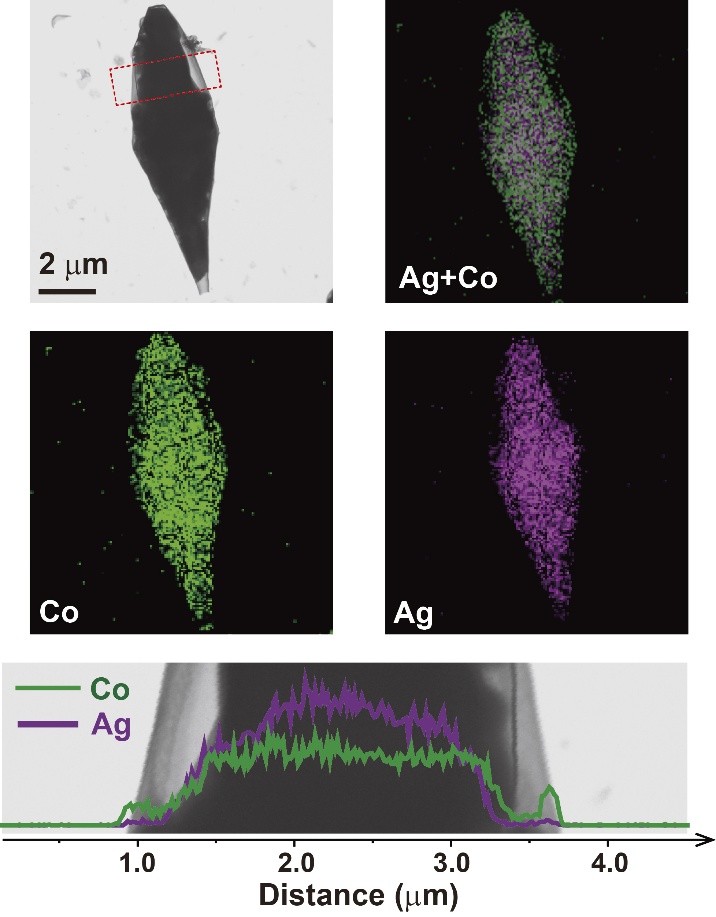
**

**Figure S6. Morphological and element mapping of a single Ag7O8NO3/AgCoO2 core/shell microtorpedo.** Top left: HAADF-STEM image of a representative microtorpedo. The red dashed rectangle indicates the region selected for the element line scan. Top right and Middle column: EDS elemental mapping results showing the spatial distribution of Co (green), Ag (purple), and the overlaid Ag and Co signals. Bottom: Element line scan profile across the microtorpedo. The profile confirms the core/shell structure with the Ag signal localized in the interior (core) and the Co signal extending across the whole structure, indicating the formation of an AgCoO2 shell.


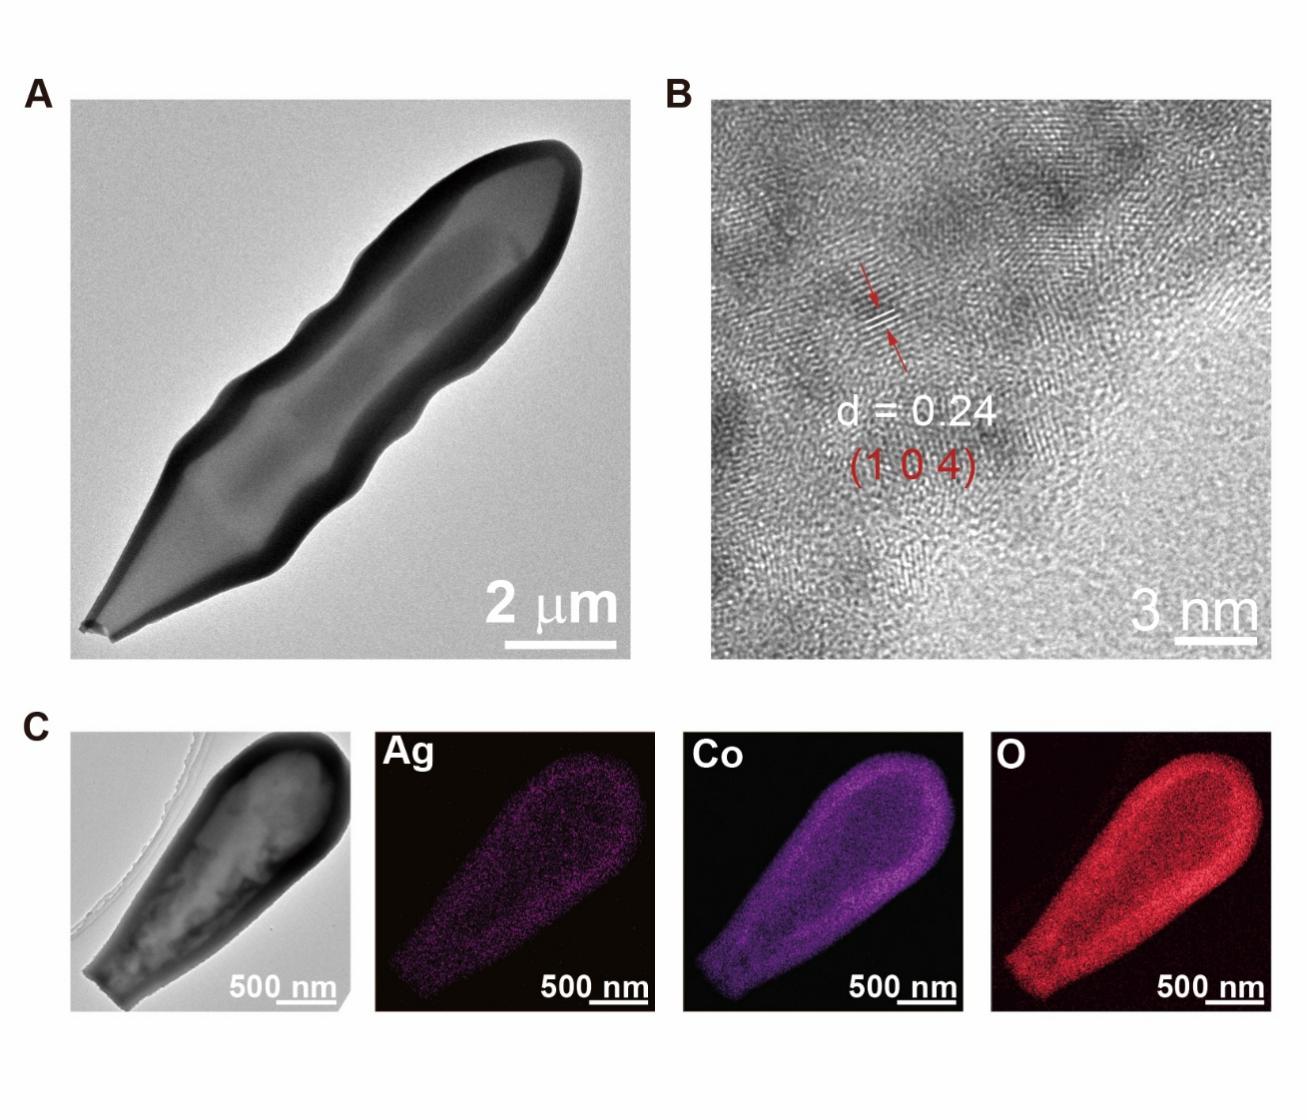


**Figure S7. Characterization of an individual AgCoO2 microtorpedo. (A)** TEM image of the hollow AgCoO2 microtorpedo. **(B)** High resolution TEM image of the hollow AgCoO2 microtorpedo, indicating its polycrystalline structure. **(C)** TEM image and element mapping results of the hollow AgCoO2 microtorpedo.

**
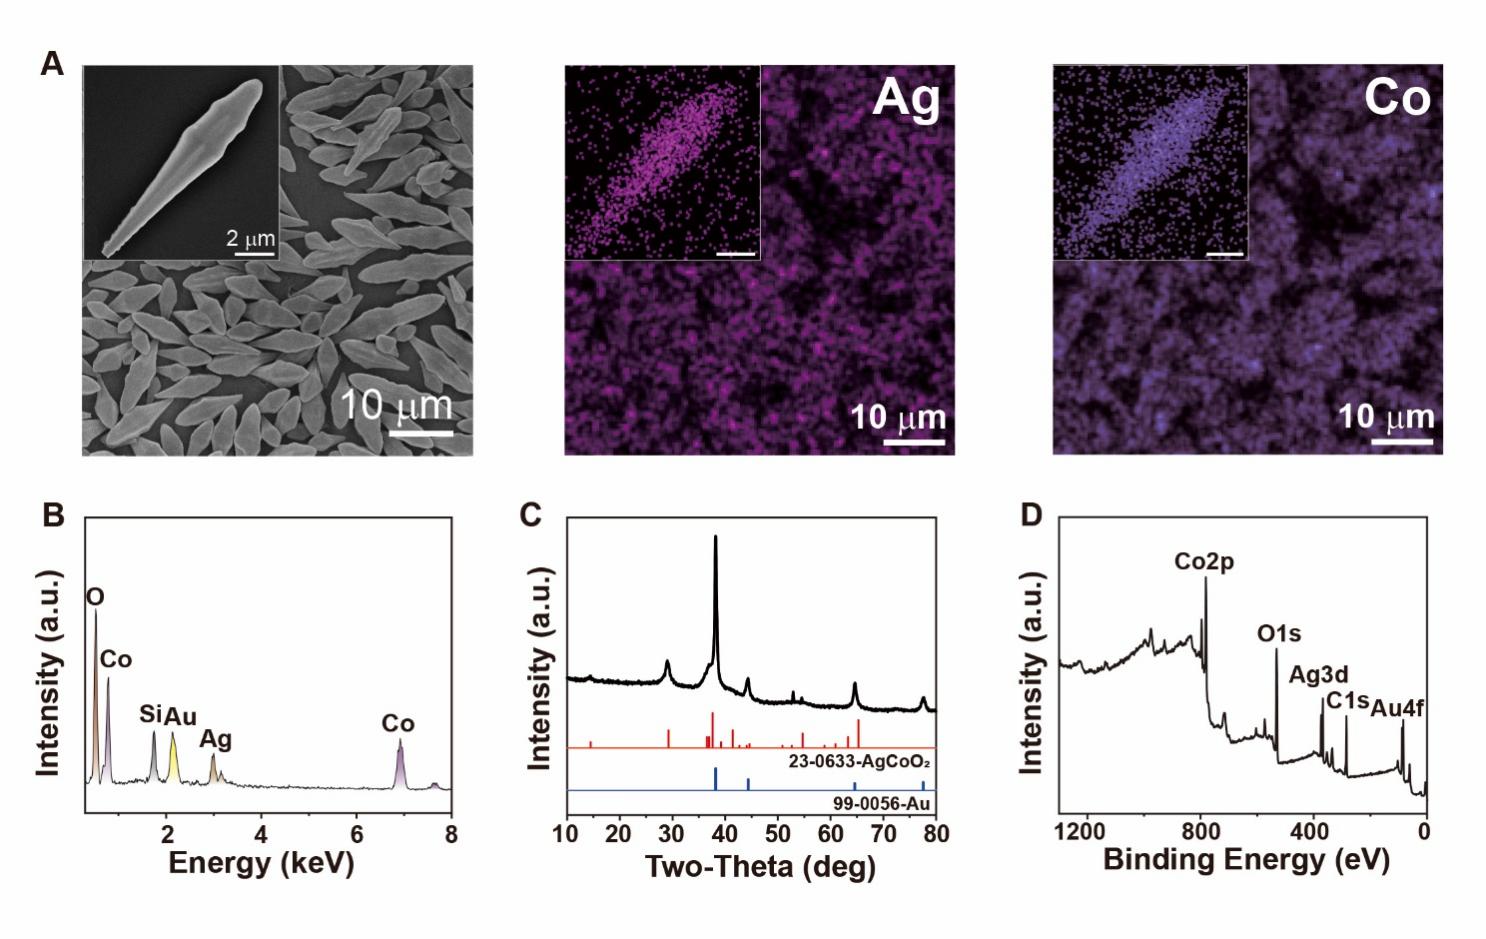
**

**Figure S8.**  **SEM image and element mapping results of AgCoO2 microtorpedoes.** The morphology of Ag7O8NO3 microtorpedoes is well preserved after complete OCE transformation to AgCoO2.


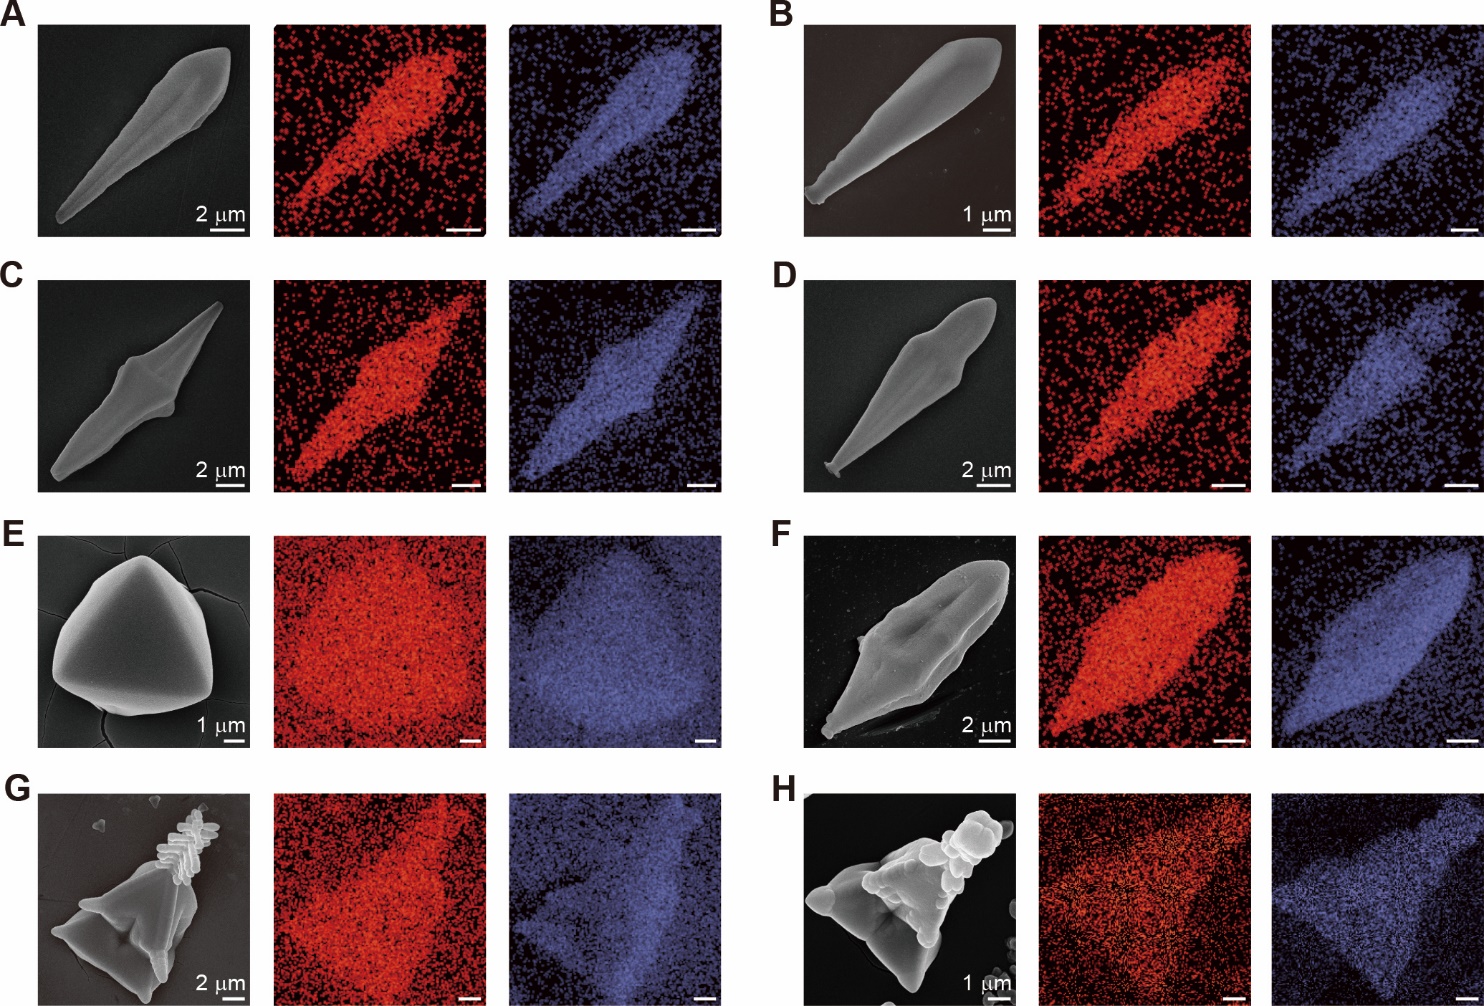


**Figure S9. Various AgCoO2 microarchitectures transformed from Ag7O8NO3.** (**A**-**H**)SEM image (left) and Ag (middle) and Co (right) element mapping results of AgCoO2 microarchitectures.


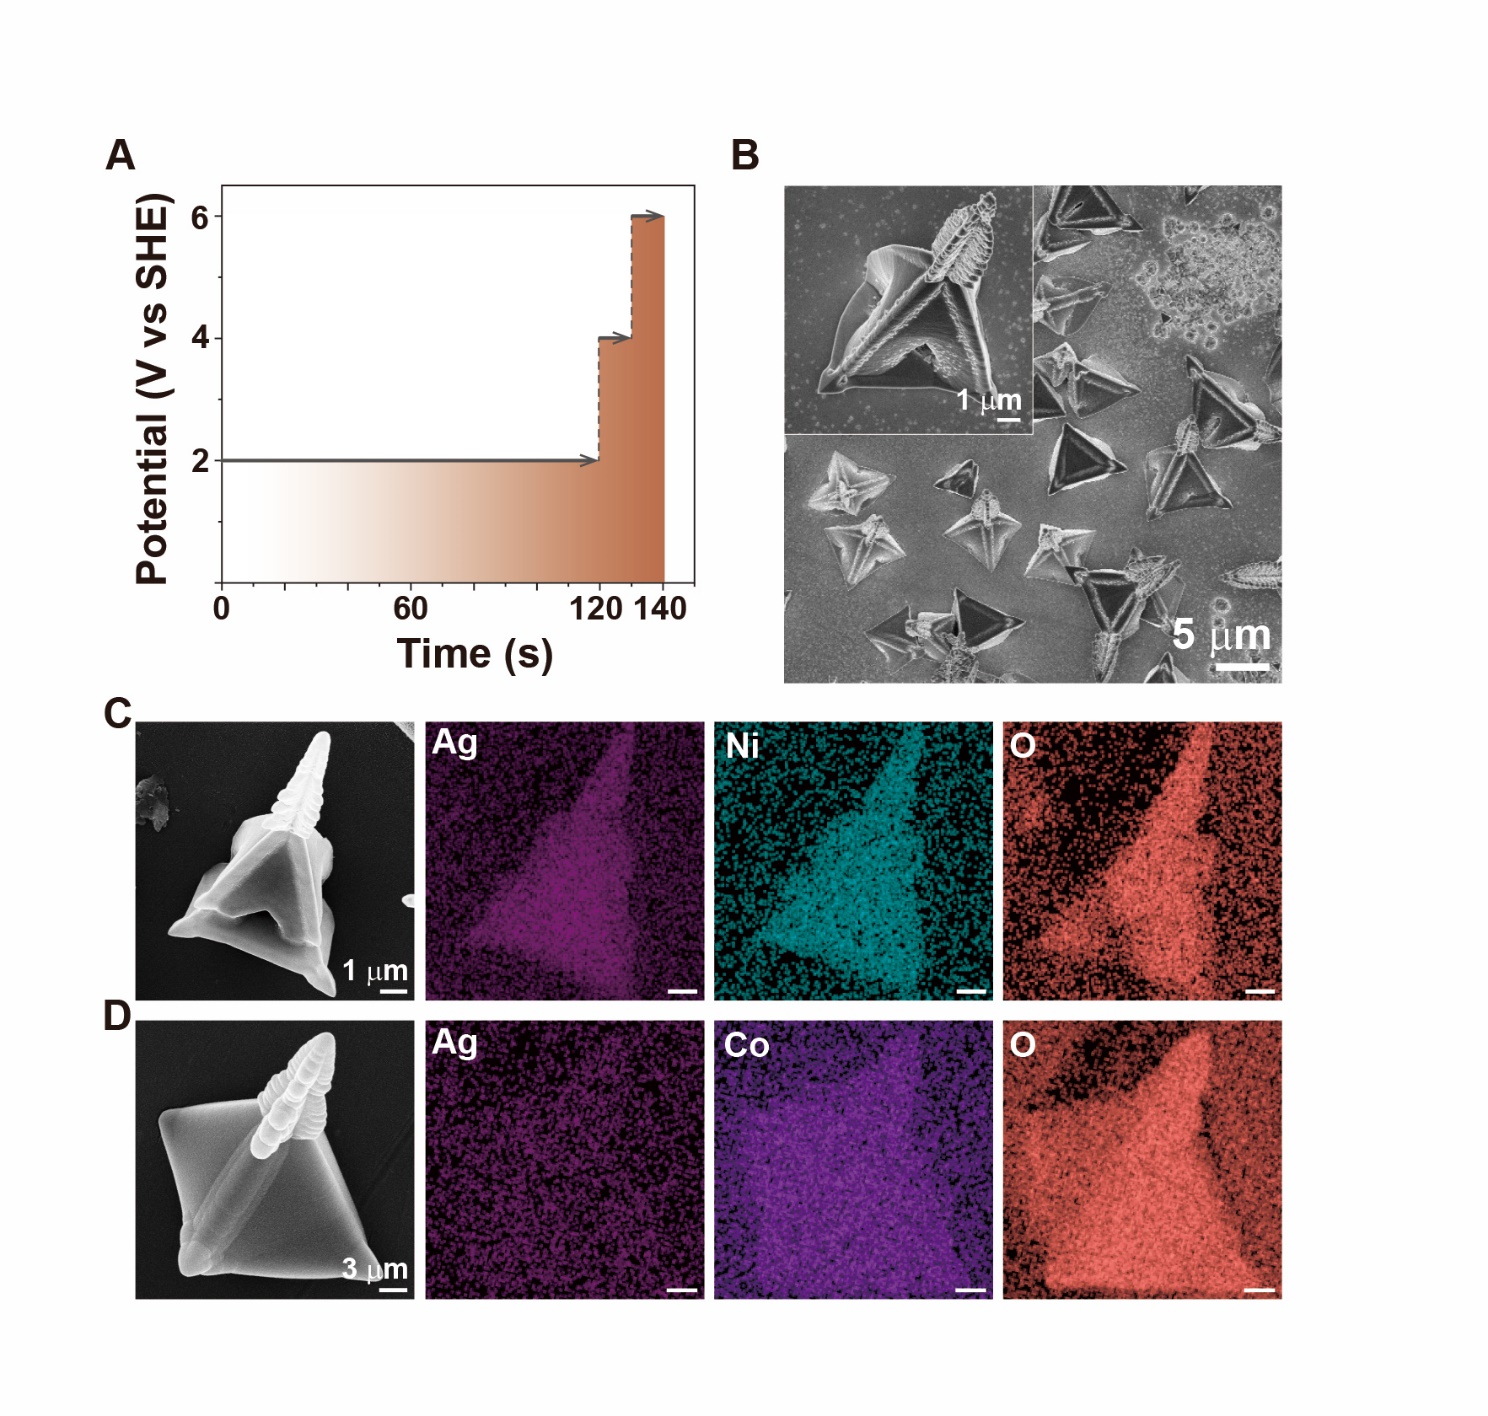


**Figure S10. Conversion of Ag7O8NO3 microarchitectures to AgNiO2 and AgCoO2 microarchitectures. (A)** The potential waveform used to fabricateAg7O8NO3 microarchitectures. **(B)** SEM image of the complex Ag7O8NO3 microarchitectures. Inset: magnified image. **(C)** SEM image and EDS mapping results of the AgNiO2 microarchitectures coverted from the Ag7O8NO3 microarchitectures. **(D)** SEM image and EDS mapping results of the AgCoO2 microarchitectures.


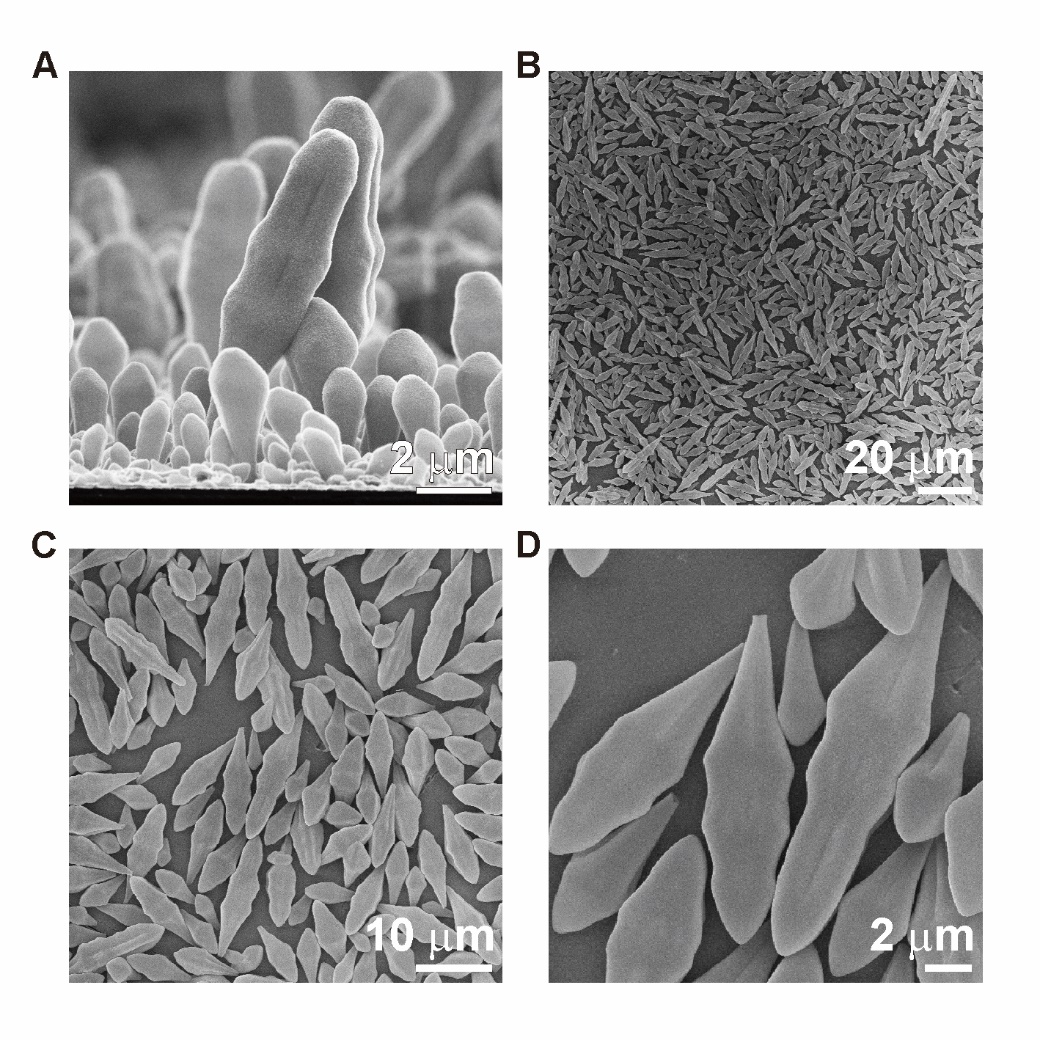


**Figure S11. Selectively peeling off AgNiO2 microtorpedoes from the electrode surface by immersing the electrode into water. (A)** AgNiO2 microtorpedoes on the anode electrode surface transformed from Ag7O8NO3 microtorpedoes. **(B-D)** AgNiO2 microtorpedoes selectively peeled off from the electrode surface.


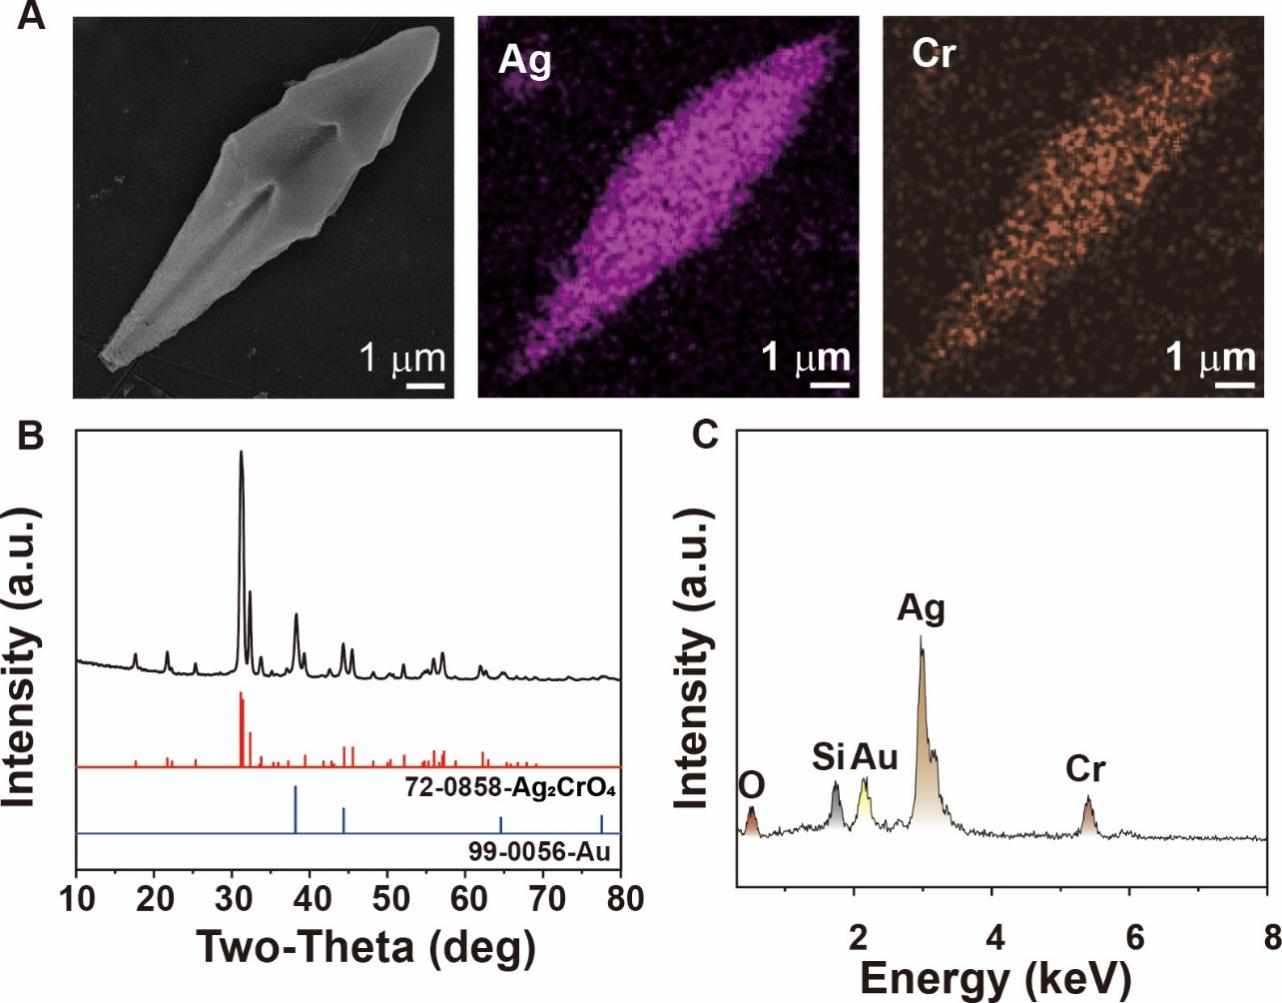


**Figure S12. Preparation of Ag2CrO4 microtorpedoes. (A)** SEM image (left) and element mapping results of Ag2CrO4 microtorpedoes. (**B** and **C**)XRD pattern and EDS spectrum of Ag2CrO4 microtorpedoes, respectively.


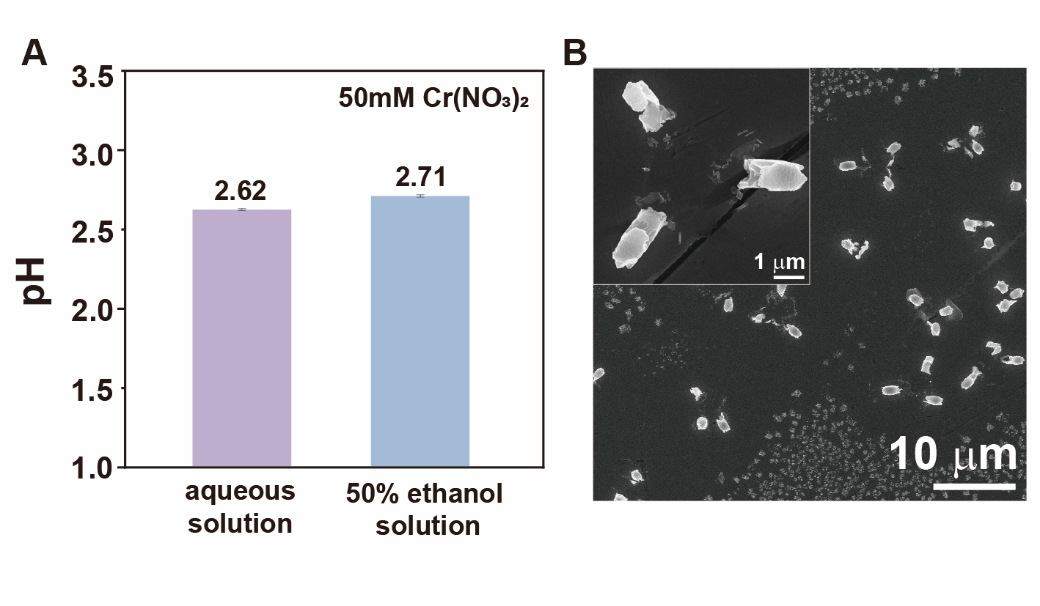


**Figure S13. Converting Ag7O8NO3 microstructures into Ag2CrO4 in Cr(NO3)3 aqueous solutions. (A)** pH value of 50 mM Cr(NO3)3 aqueous solutions and Cr(NO3)3 solutions composed of equal volume of water and ethanol. **(B)** SEM image of the Ag2CrO4 structures transformed from the Ag7O8NO3 micropyramids, indicating that the Ag2CrO4 structures were corroded in the low pH value solutions.


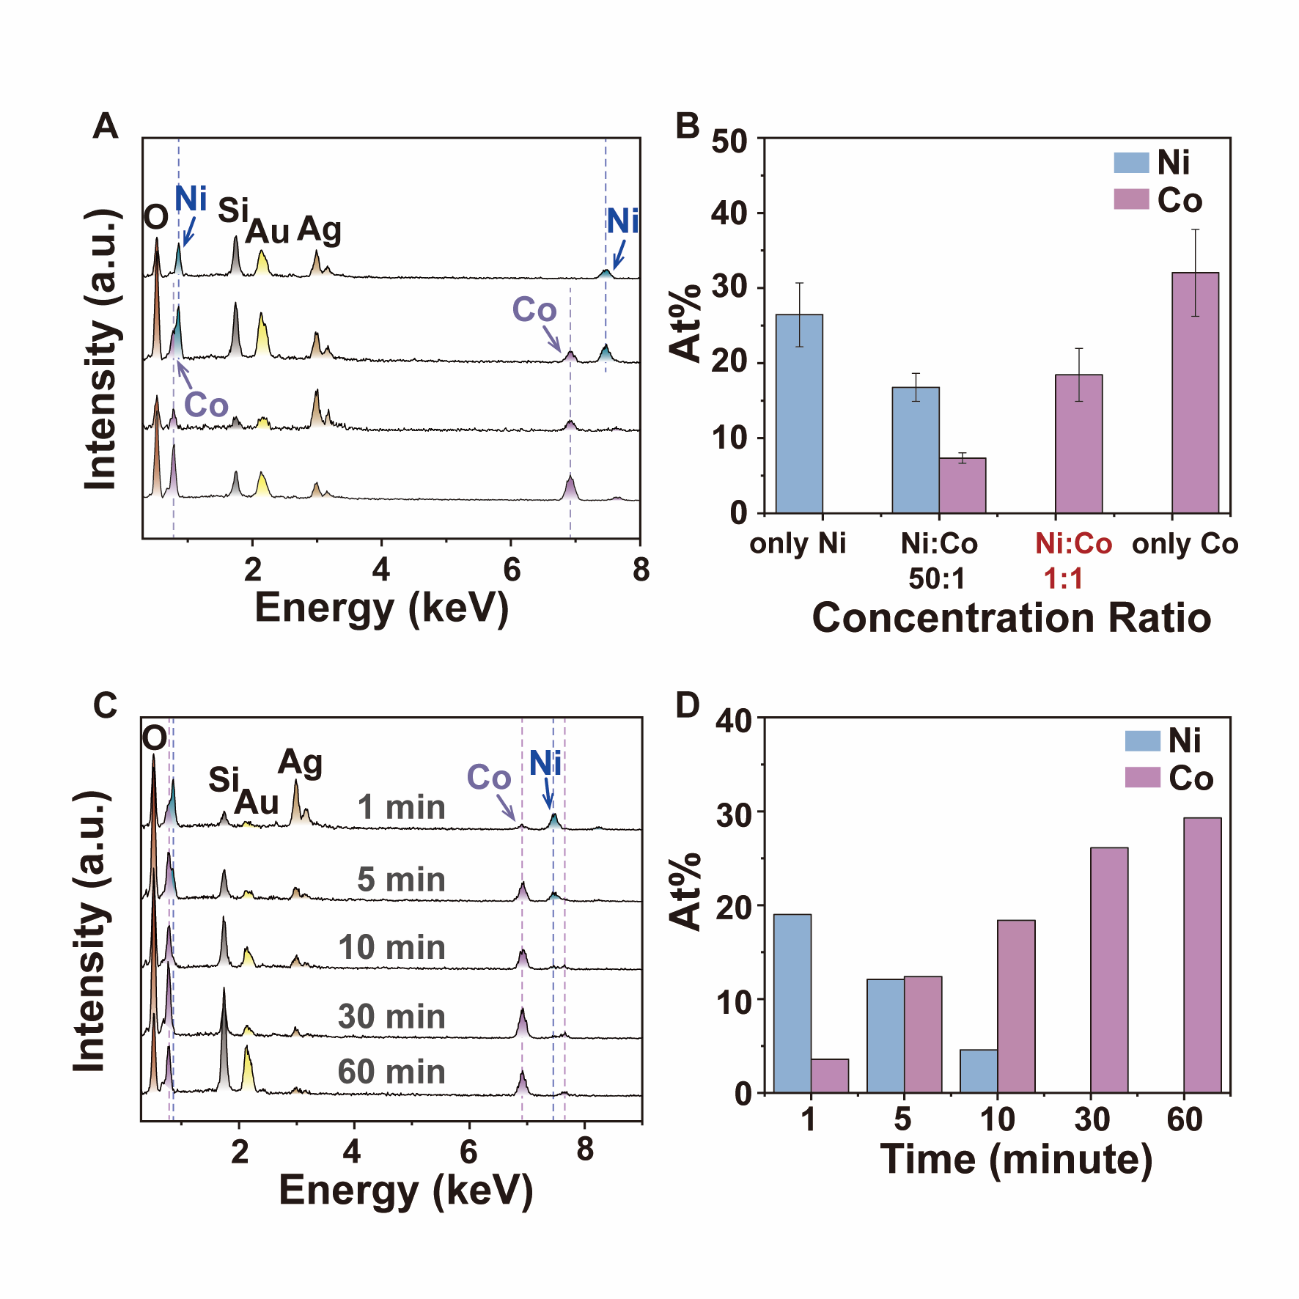


**Figure S14. Transformation of Ag7O8NO3 microtorpedoes in the mixture solution of Co(NO3)2 and Ni(NO3)2.** (**A**) EDS spectra of the transformed products by placing Ag7O8NO3 microtorpedoes in 10 ml of mixture solution of Ni(NO3)2 and Co(NO3)2 with different volume ratios (from top to bottom: only Ni(NO3)2; 50 : 1; 1:1; only Co(NO3)2). (**B**) The quantity ratio of the Ni and Co element in the EDS spectrum (from left to right corresponding to the EDS spectra from top to bottom in (**A**).


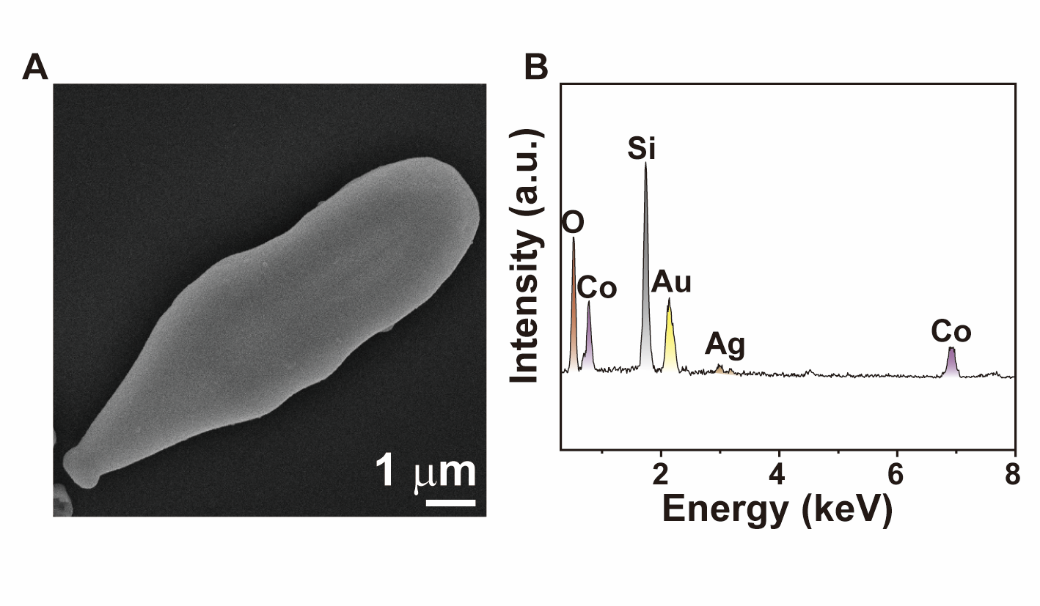


**Figure S15. AgCoO2 microtorpedoes could not react with Ni2+ ions. (A)** SEM image of the AgCoO2 microtorpedo after transferring into Ni(NO3)2 solutionsfor 1 h. (**B**) EDS spectrum confirmed the microtorpedo was still AgCoO2.


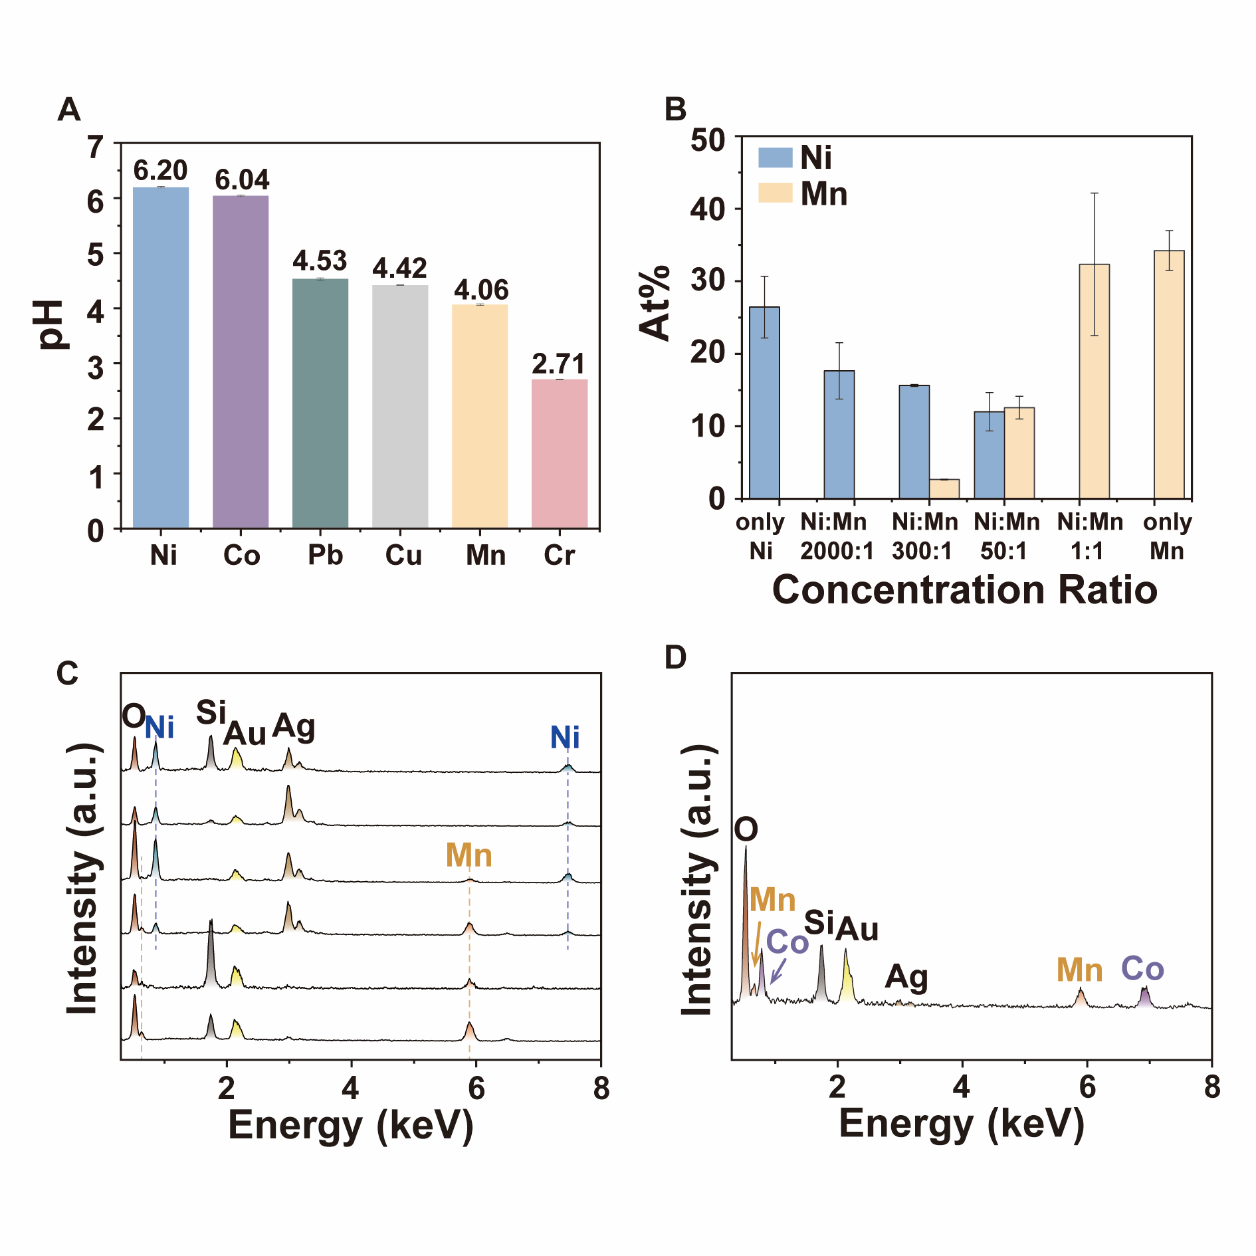


**Figure S16. Transformation of Ag7O8NO3 microtorpedoes in the mixture solution of Mn(NO3)2 and Ni(NO3)2. (A)** pH value of different reaction solutions. **(B)** Quantity ratio of Ni and Mn elements in the converted products after placing the Ag7O8NO3 microstructures into 10 ml of the mixture solution of Mn(NO3)2 and Ni(NO3)2) with different volume ratios. The concentration of the Mn(NO3)2 and Ni(NO3)2solutions was 10 mM. **(C)** The corresponding EDS spectra (from top to bottom) to B (from left to right). **(D)** EDSspectrum of the converted products in the mixture solution of Co (NO3)2, Mn (NO3)2, and Ni (NO3)2) with equal amount of Co2+, Mn2+, and Ni2+ ions. Ag7O8NO3 sequentially reacted with Co2+ and Mn2+ ions.


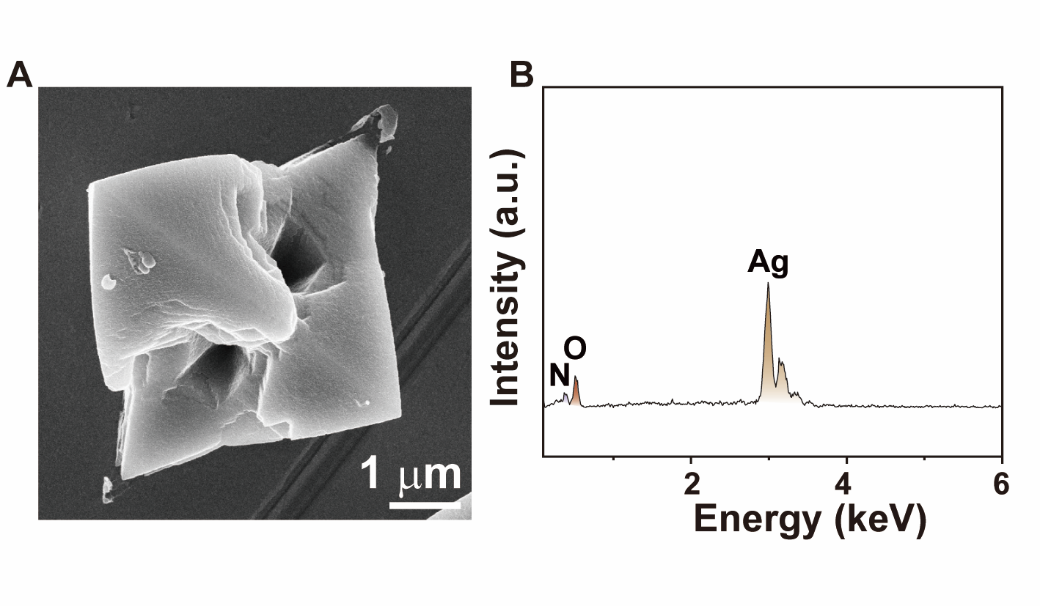


**Figure S17. No OCE reaction took place between Ag7O8NO3 and** **Fe(NO3)3 aqueous solutions.** (**A**) SEM image of Ag7O8NO3 microstructure after immersing into Fe(NO3)3 aqueous solutions. (**B**) EDS spectrum indicated that the Ag7O8NO3 microstructure did not react with the Fe3+ ions already at the highest valence.


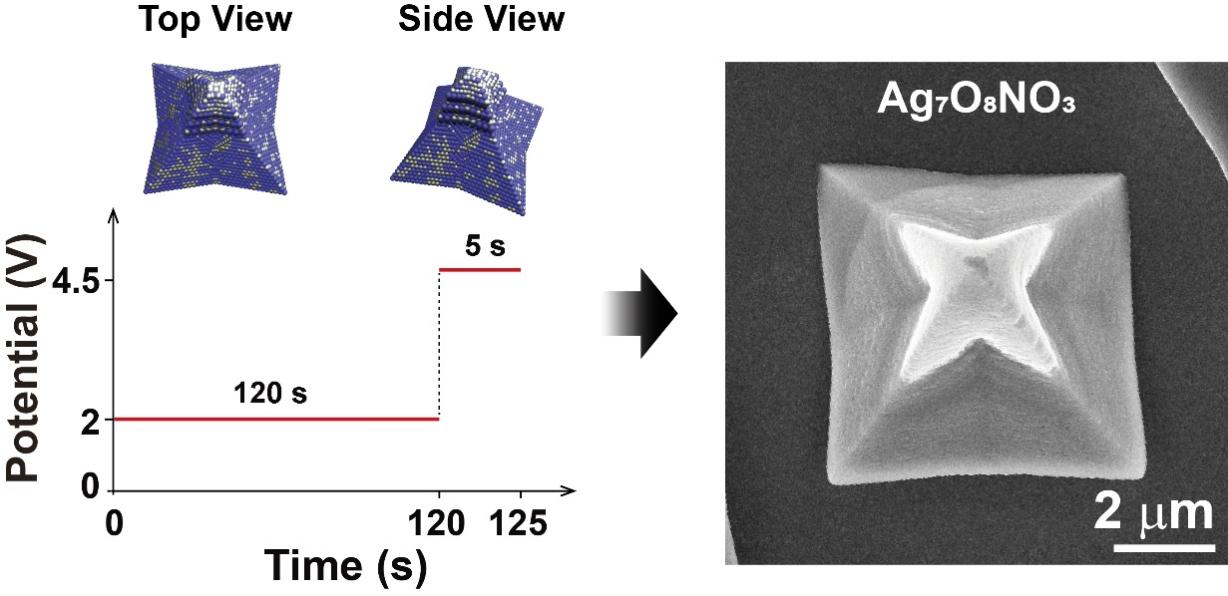


**Figure S18.** **Electrodeposition of Ag7O8NO3 micropyramids.** Left: the potential waveform used to fabricate the micropyramid. Right: the corresponding SEM image of the micropyramid with a star-like apex. This unique fine structure was used to observe the morphology evolution during OCE reactions shown in **Figure 3**.


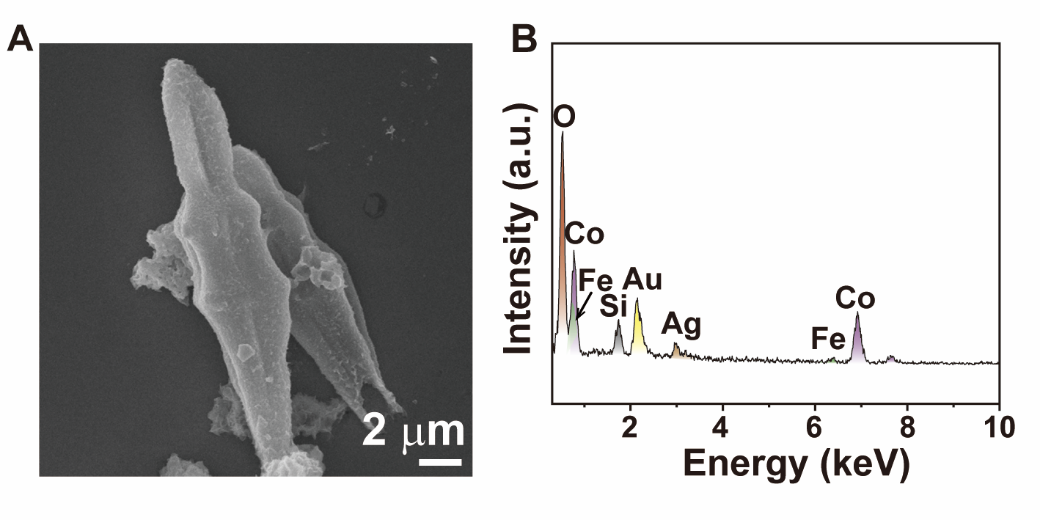


**Figure S19. Characterization of the magnetic microtorpedoes.** (**A** and **B**) SEM image and EDS spectrum of the magnetic microtorpedoes, respectively.


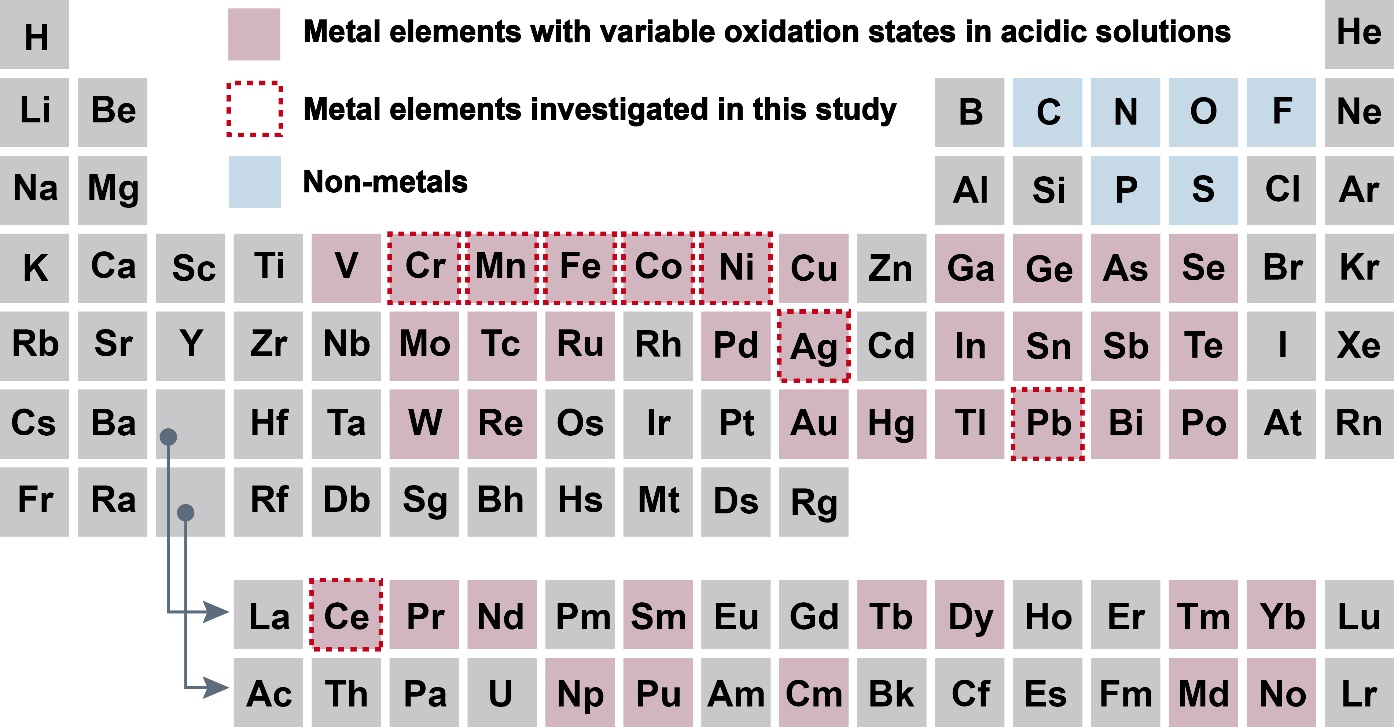


**Figure S20. Polyvalent cations in the periodic table.** Pink color marked elements have multiple valences, which are applicable to the OCE reactions.Elements in red dashed boxes (Cr, Mn, Fe, Co, Ni, Ag, Pb, and Ce) have been proven applicable to the OCE reactions and have been successfully introduced into the high-entropy metal oxides.


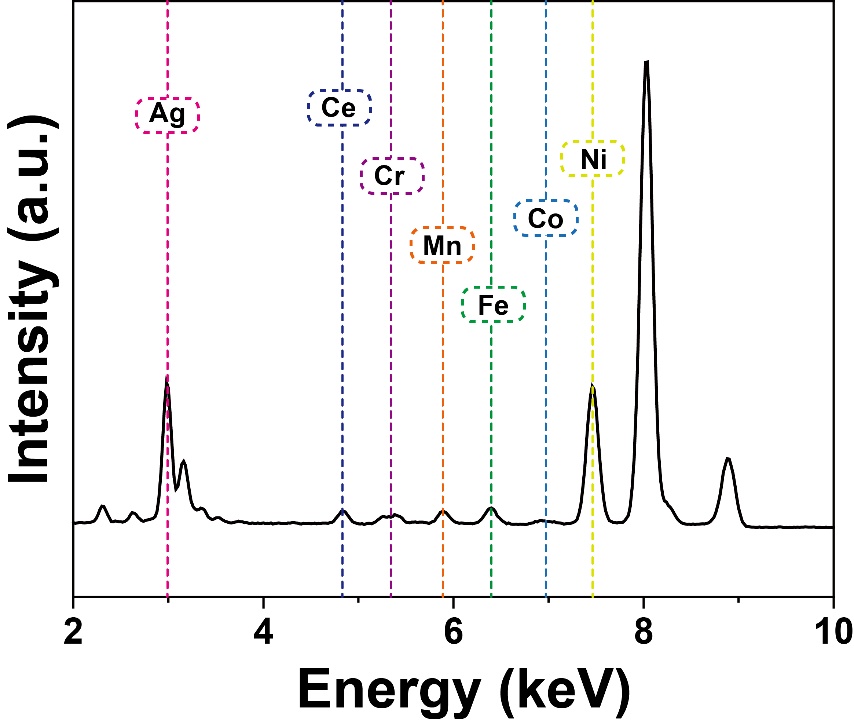


**Figure S21. EDS spectrum of the** **G-6 Ag(Ni, Ce, Co, Mn, Cr, Fe)O2 microtorpedo corresponding to Figure 4I** .


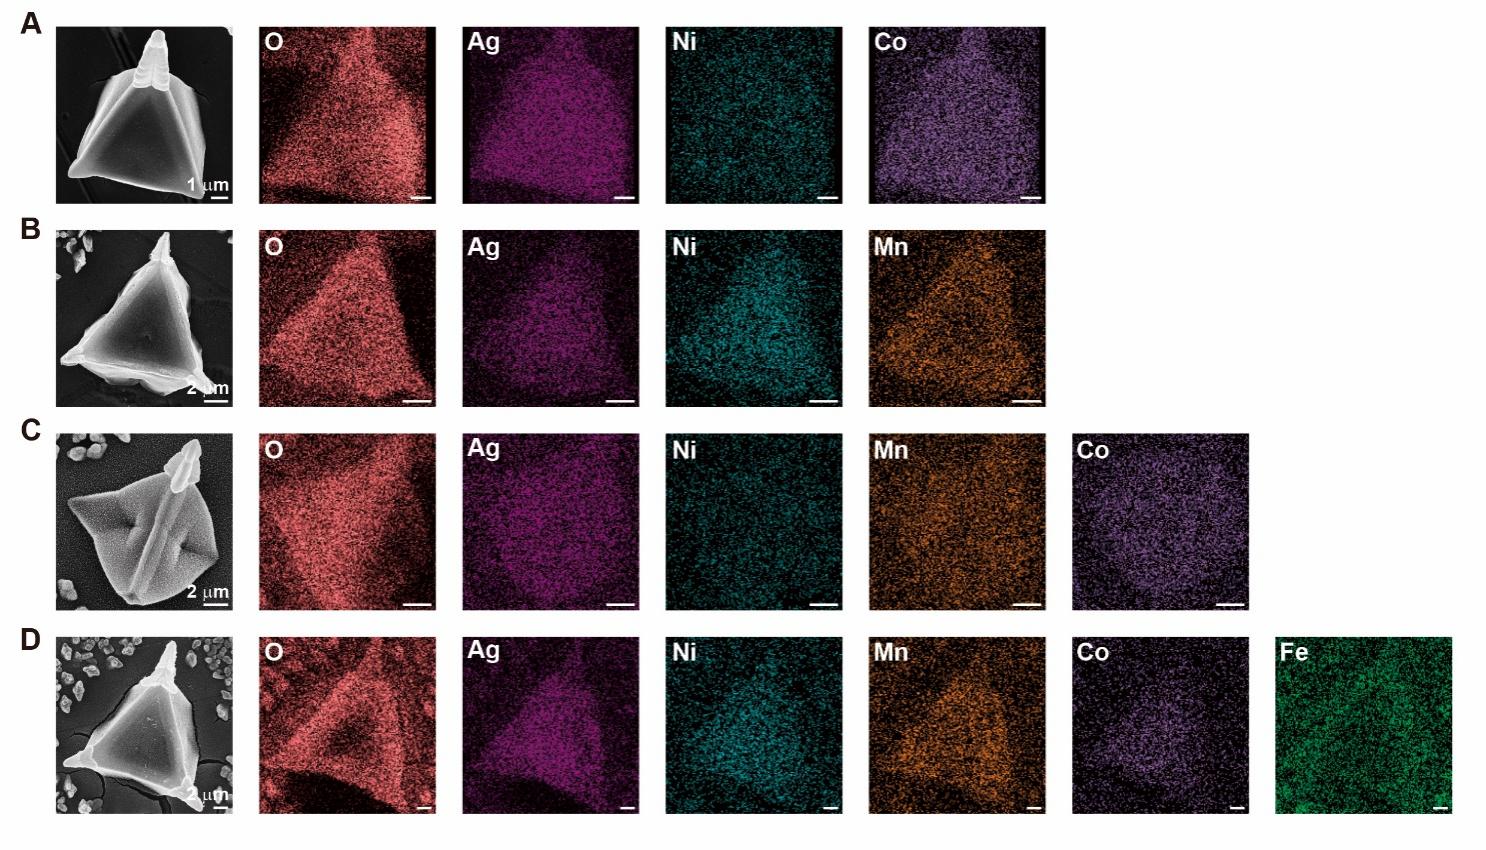


**Figure S22. Characterization of the G-2, G-3, and G-4 microarchitectures.** (**A**-**D**)SEM images (left) and element mapping results of G-2 Ag(Ni, Co)O2, G-2 Ag(Ni, Mn)O2, G-3 Ag(Ni, Mn, Co)O2, and G-4 Ag(Ni, Mn, Co, Fe)O2 microarchitectures, respectively.
